# Supplementary material for: Detection of genetic variations in the GDF9 and BMP15 genes in Kazakh meat–wool sheep
Source: Copernicus journal article supplement (doi:10.5194/aab-66-401-2023), 2023-12-07
Supplement: Supplementary file [file aab-66-401-2023-supplement.pdf]

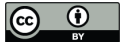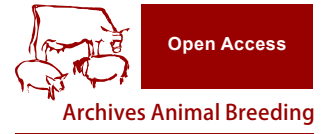

*Supplement of*

## **Detection of genetic variations in the *GDF9* and *BMP15* genes in Kazakh meat–wool sheep**

**Makpal Amandykova et al.**

*Correspondence to:* Makpal Amandykova (makpal\_30.01@mail.ru) and Kairat Dossybayev (kairat1987\_11@mail.ru)

The copyright of individual parts of the supplement might differ from the article licence.

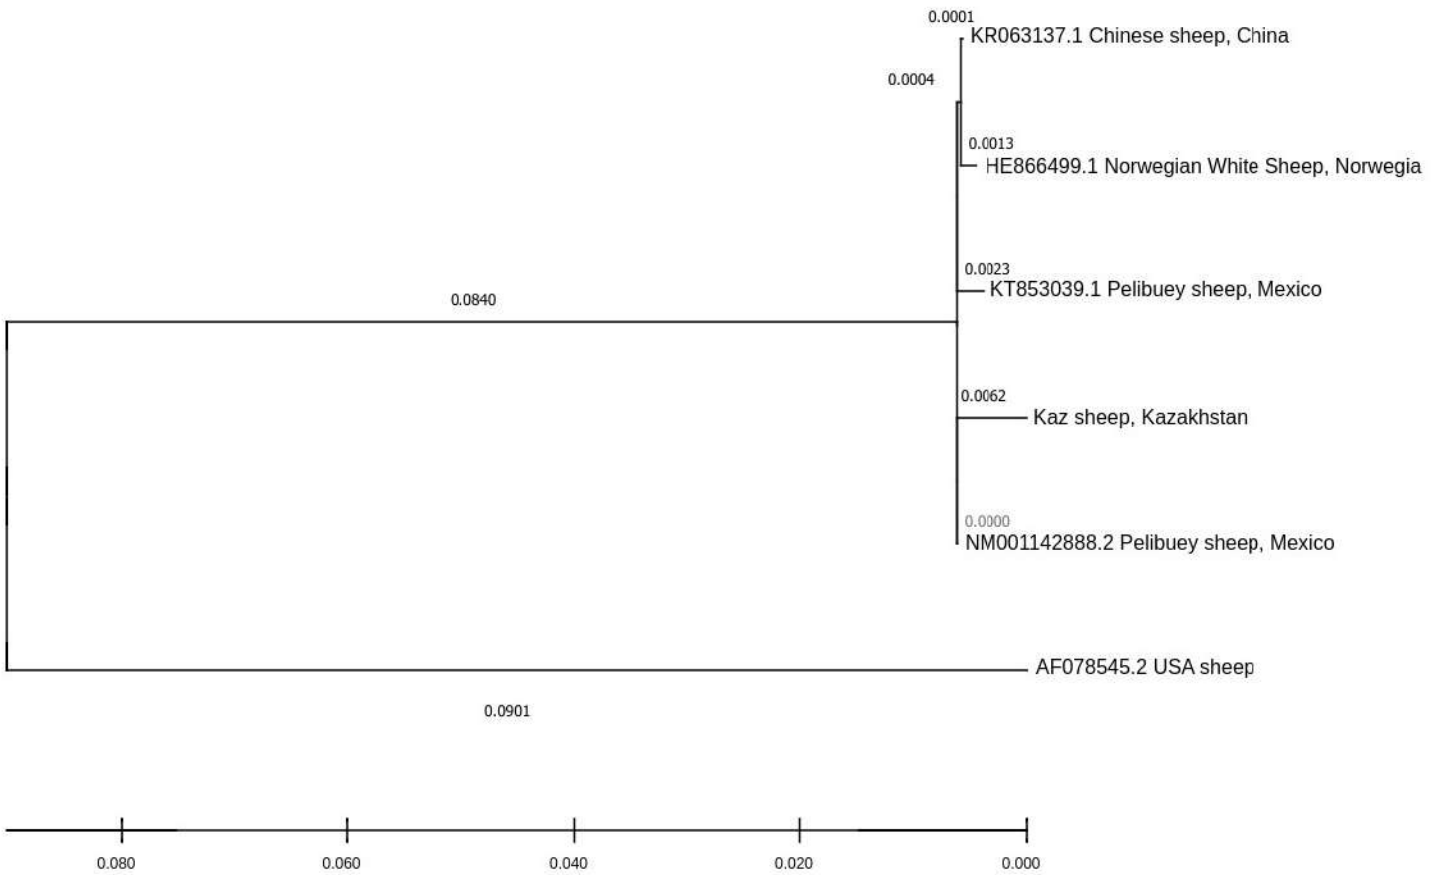

**S1. Phylogenetic tree based on GDF9 gene (Exon 2) of different sheep breeds.**

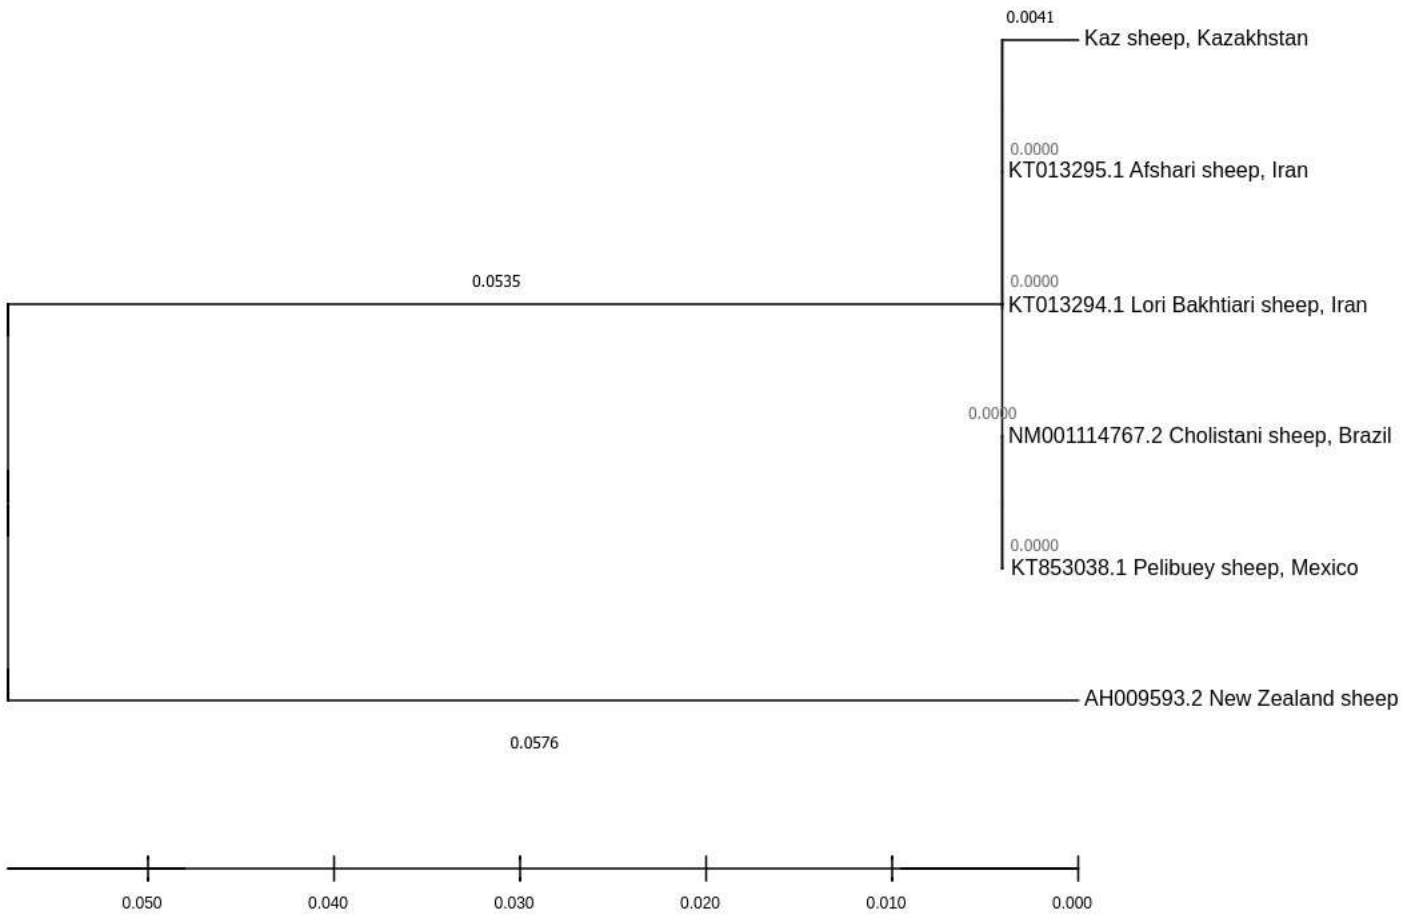

**S2. Phylogenetic tree based on BMP15 gene of different sheep breeds.**
